# Supplementary material for: Scarlet Flax Linum grandiflorum (L.) In Vitro Cultures as a New Source of Antioxidant and Anti-Inflammatory Lignans
Source: MDPI journal article supplement (doi:10.3390/molecules26154511), 2021-07-27
Supplement: s1 [file s1]

# Supplementary Materials

## Scarlet Flax *Linum grandiflorum* (L.) *in vitro* Cultures as a New Source of Antioxidant and Anti-inflammatory Lignans

Bushra Asad<sup>1</sup>, Taimoor Khan<sup>1</sup>, Faiza Zareen Gul<sup>1</sup>, Muhammad Asad Ullah<sup>1</sup>, Samantha Drouet<sup>2</sup>, Sara Mikac<sup>2</sup>, Laurine Garros<sup>2</sup>, Manon Ferrier<sup>3</sup>, Shankhamala Bose<sup>3</sup>, Thibaut Munsch<sup>3</sup>, Duangjai Tungmunthum<sup>2,4</sup>, Arnaud Lanoue<sup>3</sup>, Nathalie Giglioli-Guivarc'h<sup>3</sup>, Christophe Hano<sup>2,\*</sup>, Bilal Haider Abbasi<sup>1,\*</sup>

**Figure S1:** Total phenolic contents in the hypocotyl- and cotyledon-derived callus cultures of *L. grandiflorum* grown on PGRs (NAA and/or TDZ) treatments.

**Figure S2:** Typical HPLC chromatogram of *L. grandiflorum* callus extract showing the presence of SECO, LARI and DCA.

**Table S1:** PGRs hormonal applications (mg/L) and their effect on various parameters of callus cultures of *Linum grandiflorum*. DG; Dark green, LG: Light green, YG; Yellowish green, C; Compact, F; Friable.

**Table S2:** Pearson correlation coefficients showing the relation between the biomass (expressed in DW basis) and the main phytochemicals of *in vitro* cultures of *L. grandiflorum* (L.).

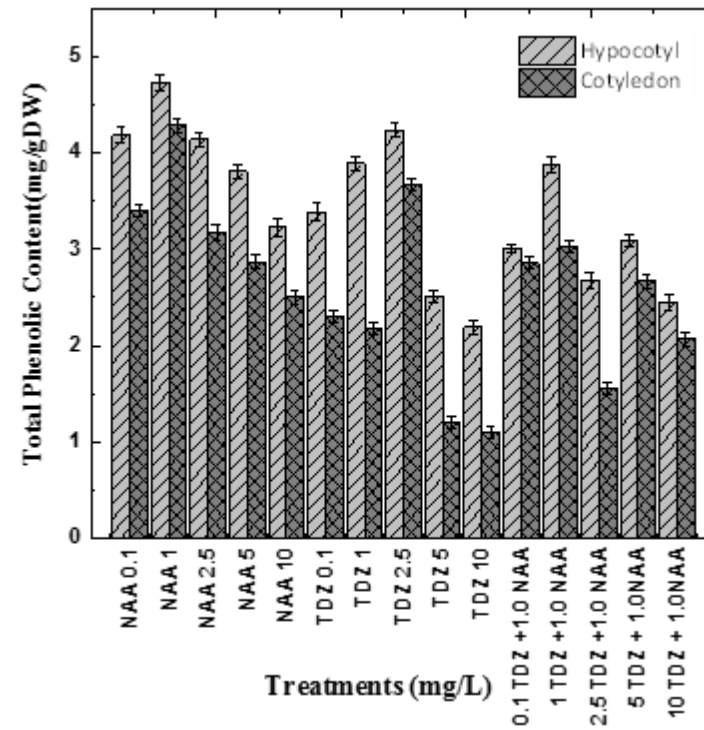

**Figure S1:** Total phenolic contents in the hypocotyl- and cotyledon-derived callus cultures of *L. grandiflorum* grown on PGRs (NAA and/or TDZ) treatments.

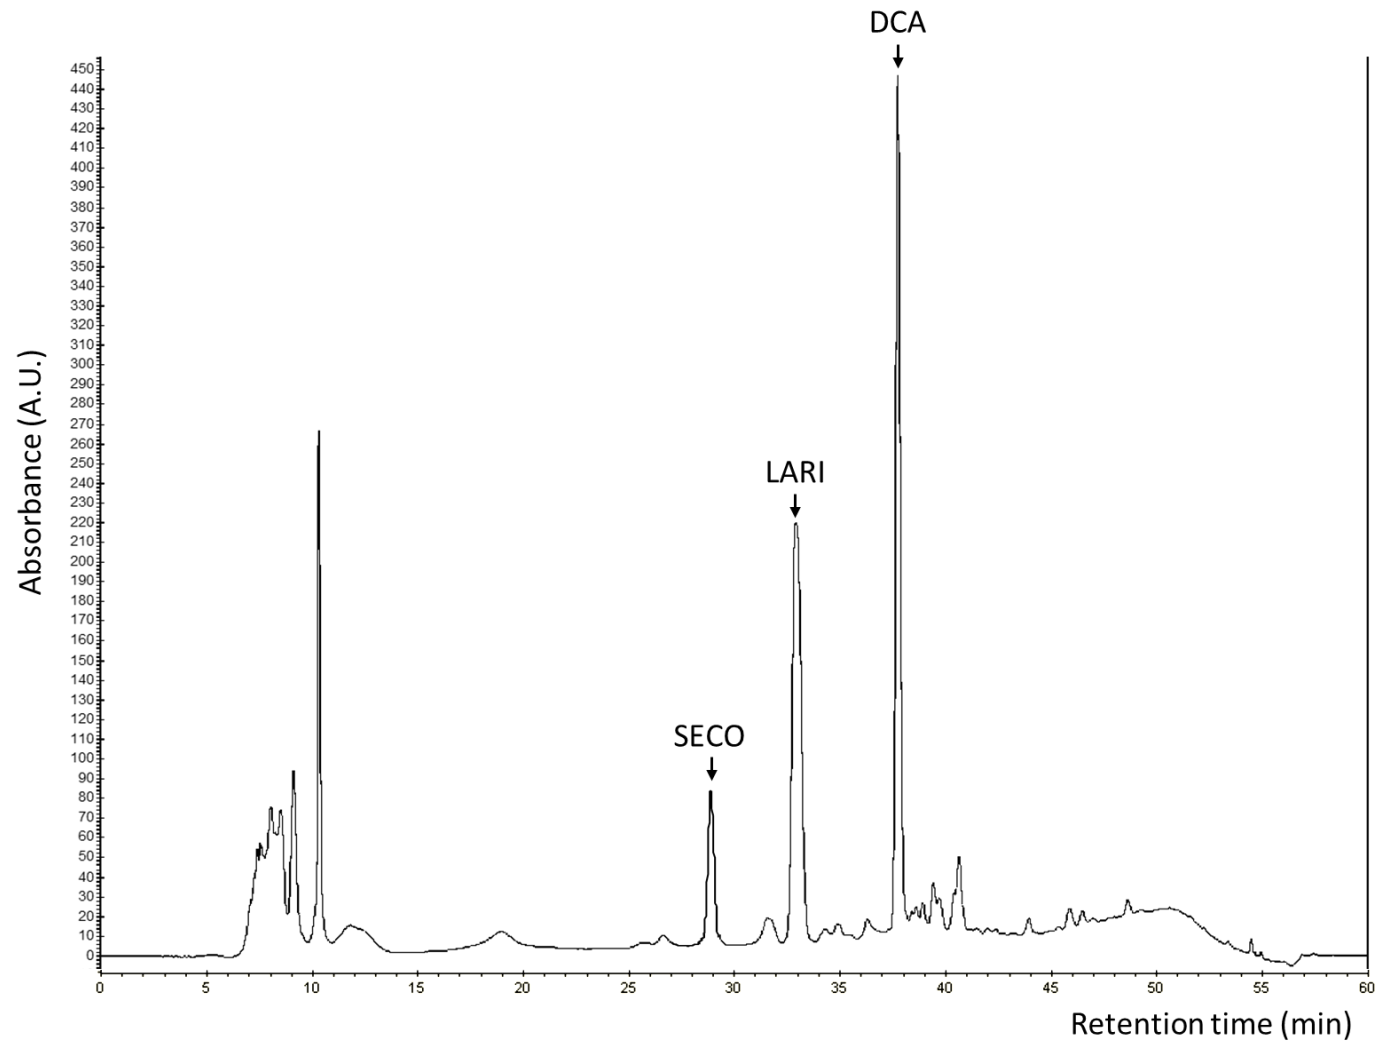

**Figure S2:** Typical HPLC chromatogram of *L. grandiflorum* callus extract showing the presence of SECO, LARI and DCA.

**Table S1:** PGRs hormonal applications (mg/L) and their effect on various parameters of callus cultures of *Linum grandiflorum*. DG; Dark green, LG: Light green, YG; Yellowish green, C; Compact, F; Friable.

| S. No | PGR's Treatment<br>mg/L | Stem Explant                  |                                  | Leaf Explant    |                   |                               |                                  |                 |                   |
|-------|-------------------------|-------------------------------|----------------------------------|-----------------|-------------------|-------------------------------|----------------------------------|-----------------|-------------------|
|       |                         | Callus<br>Initiation<br>(day) | Callus<br>Induction<br>Frequency | Callus<br>color | Callus<br>texture | Callus<br>Initiation<br>(day) | Callus<br>Induction<br>frequency | Callus<br>color | Callus<br>texture |
| 1     | MS+0.1NAA               | 14                            | 89                               | DG              | F                 | 15                            | 83                               | DG              | C                 |
| 2     | MS+1.0NAA               | 14                            | 95                               | DG              | F                 | 15                            | 87                               | DG              | C                 |
| 3     | MS+2.5NAA               | 14                            | 92                               | DG              | F                 | 15                            | 85                               | DG              | C                 |
| 4     | MS+5.0NAA               | 14                            | 77                               | DG              | F                 | 15                            | 77                               | DG              | C                 |
| 5     | MS+10 NAA               | 14                            | 81                               | DG              | F                 | 15                            | 70                               | DG              | C                 |
| 6     | MS+0.1TDZ               | 17                            | 51                               | G               | C                 | 18                            | 48                               | LG              | C                 |
| 7     | MS+1.0TDZ               | 17                            | 49                               | G               | C                 | 18                            | 44                               | LG              | C                 |
| 8     | MS+2.5TDZ               | 17                            | 66                               | G               | C                 | 18                            | 55                               | LG              | C                 |
| 9     | MS+5.0TDZ               | 17                            | 33                               | G               | C                 | 81                            | 31                               | LG              | C                 |
| 10    | MS+1.0TDZ               | 17                            | 48                               | G               | C                 | 18                            | 41                               | LG              | C                 |
| 11    | MS+0.1TDZ<br>+1.0NAA    | 15                            | 55                               | LG              | F                 | 16                            | 50                               | YG              | C                 |
| 12    | MS+1.0TDZ<br>+1.0NAA    | 15                            | 67                               | LG              | F                 | 16                            | 61                               | YG              | C                 |
| 13    | MS+2.5TDZ<br>+1.0NAA    | 15                            | 51                               | LG              | C                 | 16                            | 47                               | YG              | C                 |
| 14    | MS+5.0TDZ<br>+1.0NAA    | 15                            | 60                               | YG              | C                 | 16                            | 56                               | YG              | C                 |
| 15    | MS+10TDZ<br>+0.1NAA     | 15                            | 49                               | YG              | C                 | 16                            | 41                               | YG              | C                 |

**Table S2:** Pearson correlation coefficients showing the relation between the biomass (expressed in DW basis) and the main phytochemicals of *in vitro* cultures of *L. grandiflorum* (L.)

|         | SECO     | LARI      | DCA      |
|---------|----------|-----------|----------|
| Biomass | 0.323 ns | 0.643 *** | 0.326 ns |

Significance level: \*\*\*  $p < 0.001$ , ns: not significant.
